# Supplementary material for: Latent variable mixture modelling and individual treatment prediction
Source: PubMed Central journal article supplement (PMC7417810; doi:10.1016/j.brat.2019.103505), 2020-01
Supplement: mmc1.pdf [file mmc1.pdf]

Supplementary materials to:

**Latent variable mixture modelling and individual treatment prediction**

- \* **Appendix A. Descriptives and distribution of profiles by financial year (page 2)**
- \* **Appendix B. Comparison of outcomes between profiles across all interventions (page 4).**
- \* **Appendix C. Proportion of patients reporting outcomes of interest by financial year (page 6)**
- \* **Appendix D. Comparison of outcomes by profiles for patients receiving LI vs HI psychological interventions (page 8)**
- \* **Appendix E. Comparison of outcomes by profiles for patients receiving CBT vs Counselling (page 10)**

## Appendix A. Descriptives and distribution of profiles by financial year

**Table A1. Descriptive statistics of the profiles on included indicator variables.**

|                                             | Full<br>sample   | LP1<br>(17.6%) | LP2<br>(24.1%)  | LP3<br>(3.04%)  | LP4<br>(4.92%)  | LP5<br>(9.58%)  | LP6<br>(8.21%)   | LP7<br>(9.64%)  | LP8<br>(22.91%) |
|---------------------------------------------|------------------|----------------|-----------------|-----------------|-----------------|-----------------|------------------|-----------------|-----------------|
| Age - Mean (SD)                             | 37.56<br>(14.36) | 32.67<br>(8.6) | 29.49<br>(7.42) | 67.85<br>(9.79) | 66.07<br>(9.12) | 55.02<br>(7.6)  | 39.99<br>(10.04) | 44.03<br>(9.57) | 28.78<br>(6.96) |
| PHQ-9 - Mean (SD)                           | 13.8<br>(6.46)   | 5.71<br>(2.97) | 11.41<br>(3.16) | 4.94<br>(3.04)  | 11.09<br>(3.59) | 18.07<br>(3.41) | 13.66<br>(3.41)  | 23.18<br>(2.65) | 18.98<br>(3.16) |
| GAD-7 - Mean (SD)                           | 12.35<br>(5.43)  | 5.39<br>(2.63) | 12.56<br>(3.08) | 3.89<br>(2.49)  | 10.86<br>(3.33) | 15.99<br>(2.87) | 8.11<br>(2.64)   | 18.82<br>(2.25) | 16.53<br>(2.83) |
| WSAS - Mean (SD)                            | 17.17<br>(9.2)   | 8.88<br>(5.72) | 14.66<br>(6.28) | 6.24<br>(5.54)  | 12.01<br>(6.66) | 18.6<br>(7.53)  | 20.96<br>(6.85)  | 31.09<br>(5.47) | 22.49<br>(7.1)  |
| Gender - n(%) female                        | 29561<br>(67)    | 5023<br>(65)   | 7514<br>(71)    | 874<br>(66)     | 1536<br>(71)    | 2745<br>(65)    | 2044<br>(57)     | 2532<br>(60)    | 7293<br>(72)    |
| Ethnic Group - n (%) Non-<br>White          | 11242<br>(30)    | 1557<br>(24)   | 2097<br>(23)    | 151<br>(15)     | 277<br>(15)     | 934<br>(26)     | 1112<br>(36)     | 1503<br>(41)    | 3611<br>(41)    |
| Medication prescribed - n (%)<br>prescribed | 21310<br>(51)    | 2818<br>(39)   | 3660<br>(37)    | 502<br>(41)     | 883<br>(45)     | 2502<br>(65)    | 2498<br>(72)     | 3228<br>(82)    | 5219<br>(54)    |
| Welfare status - n (%) on<br>benefits       | 11230<br>(26)    | 817<br>(11)    | 750 (7)         | 120 (9)         | 198<br>(10)     | 1840<br>(46)    | 1944<br>(54)     | 3181<br>(78)    | 2380<br>(24)    |
| Phobia Self-rating - n (%)<br>phobia        | 20992<br>(52)    | 1868<br>(25)   | 4366<br>(43)    | 239<br>(21)     | 697<br>(37)     | 2341<br>(64)    | 1792<br>(54)     | 3237<br>(93)    | 6452<br>(70)    |

**Table A2. Distribution of patients entering treatment (1+ session) by profile & financial year.**

| Profile      | 1314         |        | 1415         |        | 1516          |        | 1617          |        | 1718          |        | Total         |        |
|--------------|--------------|--------|--------------|--------|---------------|--------|---------------|--------|---------------|--------|---------------|--------|
|              | n            | %      | n            | %      | n             | %      | n             | %      | n             | %      | n             | %      |
| LP1          | 720          | 16.35% | 1,421        | 17.58% | 1,847         | 18.32% | 1,921         | 17.53% | 1,993         | 17.51% | 7,902         | 17.60% |
| LP2          | 889          | 20.19% | 1,774        | 21.94% | 2,479         | 24.59% | 2,703         | 24.67% | 2,975         | 26.14% | 10,820        | 24.10% |
| LP3          | 139          | 3.16%  | 278          | 3.44%  | 377           | 3.74%  | 306           | 2.79%  | 265           | 2.33%  | 1,365         | 3.04%  |
| LP4          | 189          | 4.29%  | 394          | 4.87%  | 529           | 5.25%  | 589           | 5.38%  | 509           | 4.47%  | 2,210         | 4.92%  |
| LP5          | 434          | 9.86%  | 780          | 9.65%  | 971           | 9.63%  | 1,080         | 9.86%  | 1,039         | 9.13%  | 4,304         | 9.58%  |
| LP6          | 479          | 10.88% | 834          | 10.32% | 814           | 8.07%  | 774           | 7.06%  | 787           | 6.92%  | 3,688         | 8.21%  |
| LP7          | 534          | 12.13% | 774          | 9.57%  | 933           | 9.26%  | 1,072         | 9.78%  | 1,017         | 8.94%  | 4,330         | 9.64%  |
| LP8          | 1,019        | 23.14% | 1,830        | 22.63% | 2,131         | 21.14% | 2,512         | 22.93% | 2,794         | 24.55% | 10,286        | 22.91% |
| <b>Total</b> | <b>4,403</b> |        | <b>8,085</b> |        | <b>10,081</b> |        | <b>10,957</b> |        | <b>11,379</b> |        | <b>44,905</b> |        |

**Table A3. Distribution of patients included in outcome analyses by profile & financial year.**

| Profile      | 2013-14      |        | 2014-15      |        | 2015-16      |        | 2016-17      |        | 2017-18      |        | Total         |        |
|--------------|--------------|--------|--------------|--------|--------------|--------|--------------|--------|--------------|--------|---------------|--------|
|              | n            | %      | n            | %      | n            | %      | n            | %      | n            | %      | n             | %      |
| LP1          | 109          | 5.77%  | 229          | 6.97%  | 370          | 8.81%  | 362          | 8.34%  | 431          | 8.98%  | 1,501         | 8.11%  |
| LP2          | 482          | 25.53% | 924          | 28.11% | 1,375        | 32.73% | 1,524        | 35.12% | 1,707        | 35.57% | 6,012         | 32.47% |
| LP3          | 11           | 0.58%  | 26           | 0.79%  | 37           | 0.88%  | 21           | 0.48%  | 23           | 0.48%  | 118           | 0.64%  |
| LP4          | 93           | 4.93%  | 194          | 5.90%  | 284          | 6.76%  | 285          | 6.57%  | 247          | 5.15%  | 1,103         | 5.96%  |
| LP5          | 241          | 12.76% | 368          | 11.20% | 452          | 10.76% | 433          | 9.98%  | 423          | 8.81%  | 1,917         | 10.35% |
| LP6          | 226          | 11.97% | 405          | 12.32% | 403          | 9.59%  | 346          | 7.97%  | 400          | 8.34%  | 1,780         | 9.61%  |
| LP7          | 239          | 12.66% | 296          | 9.01%  | 272          | 6.47%  | 277          | 6.38%  | 295          | 6.15%  | 1,379         | 7.45%  |
| LP8          | 487          | 25.79% | 845          | 25.71% | 1,008        | 23.99% | 1,091        | 25.14% | 1,273        | 26.53% | 4,704         | 25.41% |
| <b>Total</b> | <b>1,888</b> |        | <b>3,287</b> |        | <b>4,201</b> |        | <b>4,339</b> |        | <b>4,799</b> |        | <b>18,514</b> |        |

**Figure A1. Distribution of profiles by financial year**

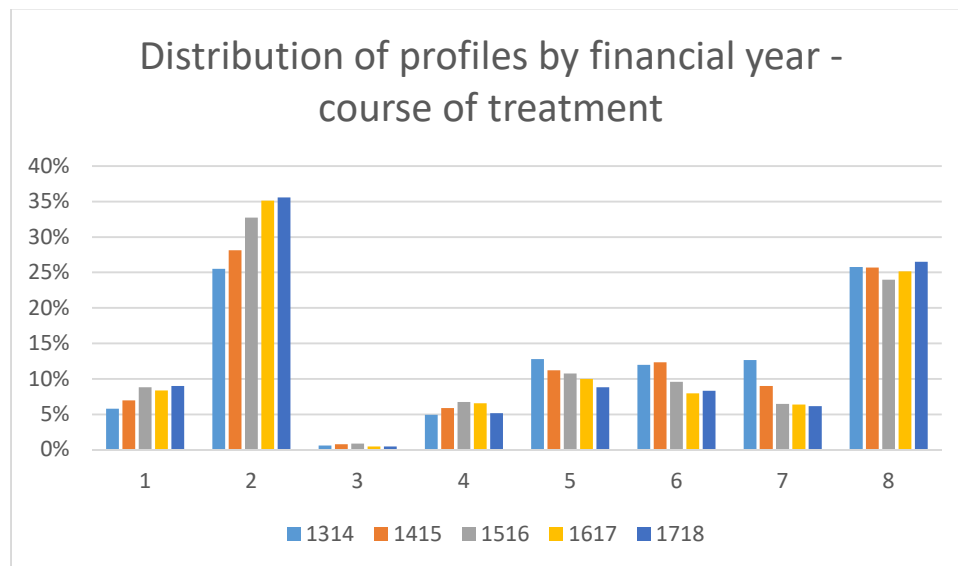

**Appendix B. Comparison of outcomes between profiles (across all interventions).**

**Table B1. Proportion of patients meeting outcomes by profile**

| Profile | n     | % Recovery | % Reliable Recovery | % Reliable Improvement | % Deterioration | % Attrition |
|---------|-------|------------|---------------------|------------------------|-----------------|-------------|
| LP1     | 1501  | 70.49%     | 48.26%              | 51.83%                 | 9.33%           | 22.44%      |
| LP2     | 6012  | 54.37%     | 51.39%              | 69.13%                 | 7.52%           | 24.25%      |
| LP3     | 118   | 76.27%     | 55.93%              | 58.12%                 | 11.97%          | 14.42%      |
| LP4     | 1103  | 63.92%     | 57.39%              | 68.27%                 | 8.39%           | 12.82%      |
| LP5     | 1917  | 32.24%     | 32.06%              | 67.98%                 | 6.23%           | 21.10%      |
| LP6     | 1780  | 53.03%     | 45.87%              | 56.75%                 | 14.42%          | 25.90%      |
| LP7     | 1379  | 17.69%     | 17.69%              | 57.39%                 | 4.39%           | 33.00%      |
| LP8     | 4704  | 31.97%     | 31.81%              | 70.33%                 | 5.53%           | 34.97%      |
| Total   | 18514 | 45.54%     | 41.49%              | 65.74%                 | 7.54%           | 26.42%      |

**Table B2. Logistic regression analyses comparing odds of recovery between all profiles and LP4, and all profiles against LP7.**

| Recovery |                 |         |         |      |     |                 |        |      |       |
|----------|-----------------|---------|---------|------|-----|-----------------|--------|------|-------|
|          | Odds ratio      | p-value | 95% Cis |      |     |                 |        |      |       |
|          | LP4 = reference |         |         |      |     | LP7 = reference |        |      |       |
| LP1      | 1.35            | <0.001  | 1.14    | 1.59 | LP1 | 11.11           | <0.001 | 9.30 | 13.26 |
| LP2      | 0.67            | <0.001  | 0.59    | 0.77 | LP2 | 5.54            | <0.001 | 4.78 | 6.42  |
| LP3      | 1.81            | 0.01    | 1.17    | 2.82 | LP3 | 14.95           | <0.001 | 9.57 | 23.36 |
| LP5      | 0.27            | <0.001  | 0.23    | 0.31 | LP4 | 8.24            | <0.001 | 6.85 | 9.91  |
| LP6      | 0.64            | <0.001  | 0.55    | 0.74 | LP5 | 2.21            | <0.001 | 1.87 | 2.62  |
| LP7      | 0.12            | <0.001  | 0.10    | 0.15 | LP6 | 5.25            | <0.001 | 4.45 | 6.21  |
| LP8      | 0.27            | <0.001  | 0.23    | 0.30 | LP8 | 2.19            | <0.001 | 1.88 | 2.54  |

**Table B3. Logistic regression analyses comparing odds of reliable recovery between all profiles and LP4, and all profiles against LP7.**

| Reliable Recovery |                 |         |         |      |     |                 |        |      |      |
|-------------------|-----------------|---------|---------|------|-----|-----------------|--------|------|------|
|                   | Odds ratio      | p-value | 95% Cis |      |     |                 |        |      |      |
|                   | LP4 = reference |         |         |      |     | LP7 = reference |        |      |      |
| LP1               | 0.69            | <0.001  | 0.59    | 0.81 | LP1 | 4.34            | <0.001 | 3.65 | 5.15 |
| LP2               | 0.78            | <0.001  | 0.69    | 0.89 | LP2 | 4.92            | <0.001 | 4.24 | 5.70 |
| LP3               | 0.94            | 0.761   | 0.64    | 1.38 | LP3 | 5.90            | <0.001 | 4.00 | 8.71 |
| LP5               | 0.35            | <0.001  | 0.30    | 0.41 | LP4 | 6.26            | <0.001 | 5.22 | 7.52 |
| LP6               | 0.63            | <0.001  | 0.54    | 0.73 | LP5 | 2.20            | <0.001 | 1.85 | 2.60 |
| LP7               | 0.16            | <0.001  | 0.13    | 0.19 | LP6 | 3.94            | <0.001 | 3.34 | 4.66 |
| LP8               | 0.35            | <0.001  | 0.30    | 0.40 | LP8 | 2.17            | <0.001 | 1.87 | 2.52 |

**Table B4. Logistic regression analyses comparing odds of reliable improvement between all profiles and LP8, and all profiles against LP1.**

| Reliable improvement |      |        |         |      |                 |      |            |      |      |         |  |         |  |  |
|----------------------|------|--------|---------|------|-----------------|------|------------|------|------|---------|--|---------|--|--|
| Odds ratio           |      |        | p-value |      | 95% Cis         |      | Odds ratio |      |      | p-value |  | 95% Cis |  |  |
| LP8 = reference      |      |        |         |      | LP1 = reference |      |            |      |      |         |  |         |  |  |
| LP1                  | 0.45 | <0.001 | 0.40    | 0.51 | LP2             | 2.08 | <0.001     | 1.85 | 2.34 |         |  |         |  |  |
| LP2                  | 0.94 | 0.180  | 0.87    | 1.03 | LP3             | 1.29 | 0.19       | 0.88 | 1.89 |         |  |         |  |  |
| LP3                  | 0.59 | 0.005  | 0.40    | 0.85 | LP4             | 2.00 | <0.001     | 1.70 | 2.36 |         |  |         |  |  |
| LP4                  | 0.91 | 0.180  | 0.79    | 1.05 | LP5             | 1.97 | <0.001     | 1.71 | 2.27 |         |  |         |  |  |
| LP5                  | 0.90 | 0.059  | 0.80    | 1.00 | LP6             | 1.22 | 0.01       | 1.06 | 1.40 |         |  |         |  |  |
| LP6                  | 0.55 | <0.001 | 0.49    | 0.62 | LP7             | 1.25 | <0.001     | 1.08 | 1.45 |         |  |         |  |  |
| LP7                  | 0.57 | <0.001 | 0.50    | 0.64 | LP8             | 2.20 | <0.001     | 1.95 | 2.49 |         |  |         |  |  |

**Table B5. Logistic regression analyses comparing odds of deterioration b between all profiles and LP7, and all profiles against LP6.**

| Deterioration   |      |        |         |      |                 |      |            |      |      |         |  |         |  |  |
|-----------------|------|--------|---------|------|-----------------|------|------------|------|------|---------|--|---------|--|--|
| Odds ratio      |      |        | p-value |      | 95% Cis         |      | Odds ratio |      |      | p-value |  | 95% Cis |  |  |
| LP7 = reference |      |        |         |      | LP6 = reference |      |            |      |      |         |  |         |  |  |
| LP1             | 2.24 | <0.001 | 1.64    | 3.07 | LP1             | 0.61 | <0.001     | 0.49 | 0.76 |         |  |         |  |  |
| LP2             | 1.77 | <0.001 | 1.34    | 2.34 | LP2             | 0.48 | <0.001     | 0.41 | 0.57 |         |  |         |  |  |
| LP3             | 2.96 | 0.001  | 1.60    | 5.48 | LP3             | 0.81 | 0.463      | 0.45 | 1.43 |         |  |         |  |  |
| LP4             | 2.00 | <0.001 | 1.43    | 2.79 | LP4             | 0.54 | <0.001     | 0.42 | 0.70 |         |  |         |  |  |
| LP5             | 1.45 | 0.023  | 1.05    | 1.99 | LP5             | 0.39 | <0.001     | 0.31 | 0.50 |         |  |         |  |  |
| LP6             | 3.67 | <0.001 | 2.75    | 4.91 | LP7             | 0.27 | <0.001     | 0.20 | 0.36 |         |  |         |  |  |
| LP8             | 1.28 | 0.096  | 0.96    | 1.70 | LP8             | 0.35 | <0.001     | 0.29 | 0.42 |         |  |         |  |  |

**Table B6. Logistic regression analyses comparing odds of attrition between all profiles and LP4, and all profiles against LP8.**

| Attrition       |      |        |         |      |                 |      |            |      |      |         |  |         |  |  |
|-----------------|------|--------|---------|------|-----------------|------|------------|------|------|---------|--|---------|--|--|
| Odds ratio      |      |        | p-value |      | 95% Cis         |      | Odds ratio |      |      | p-value |  | 95% Cis |  |  |
| LP4 = reference |      |        |         |      | LP8 = reference |      |            |      |      |         |  |         |  |  |
| LP1             | 1.97 | <0.001 | 1.57    | 2.47 | LP1             | 0.54 | <0.001     | 0.47 | 0.62 |         |  |         |  |  |
| LP2             | 2.18 | <0.001 | 1.79    | 2.65 | LP2             | 0.60 | <0.001     | 0.54 | 0.65 |         |  |         |  |  |
| LP3             | 1.15 | 0.643  | 0.64    | 2.04 | LP3             | 0.31 | <0.001     | 0.18 | 0.54 |         |  |         |  |  |
| LP5             | 1.82 | <0.001 | 1.46    | 2.27 | LP4             | 0.27 | <0.001     | 0.22 | 0.33 |         |  |         |  |  |
| LP6             | 2.38 | <0.001 | 1.91    | 2.96 | LP5             | 0.50 | <0.001     | 0.43 | 0.57 |         |  |         |  |  |
| LP7             | 3.35 | <0.001 | 2.67    | 4.20 | LP6             | 0.65 | <0.001     | 0.57 | 0.74 |         |  |         |  |  |
| LP8             | 3.66 | <0.001 | 3.00    | 4.46 | LP7             | 0.92 | 0.227      | 0.79 | 1.06 |         |  |         |  |  |

**Appendix C. Proportion of patients reporting outcomes of interest by financial year.**

**Figure C1. Proportion of patients in recovery across profiles by financial year.**

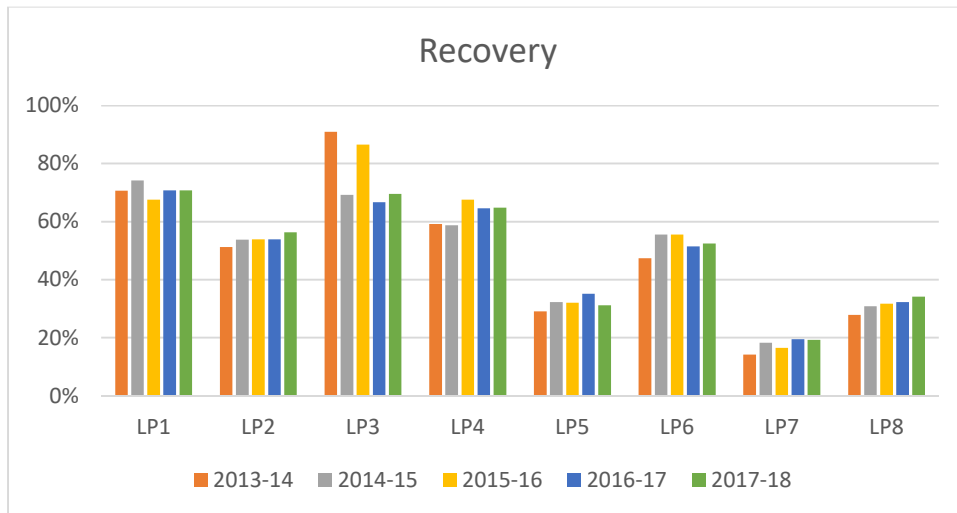

**Figure C2. Proportion of patients reporting reliable recovery across profiles by financial year.**

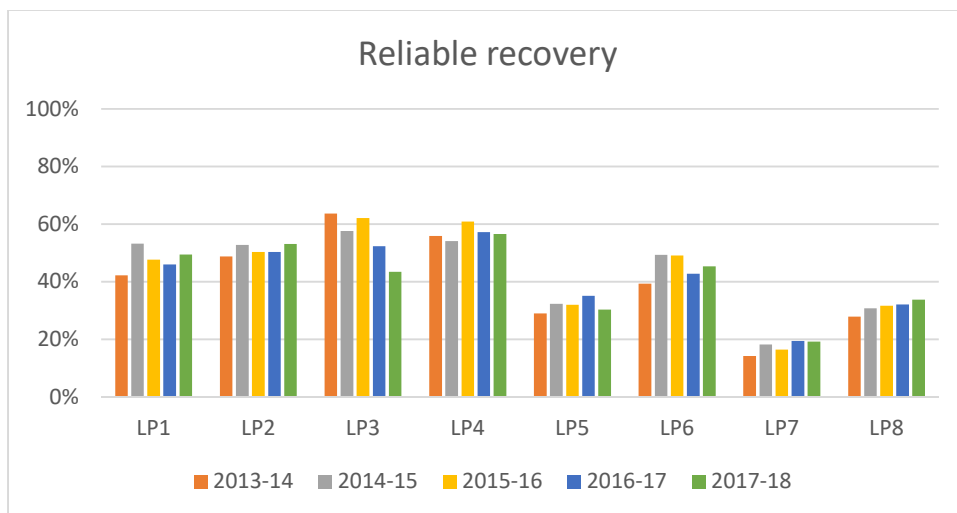

**Figure C3. Proportion of patients reporting reliable improvement across profiles by financial year.**

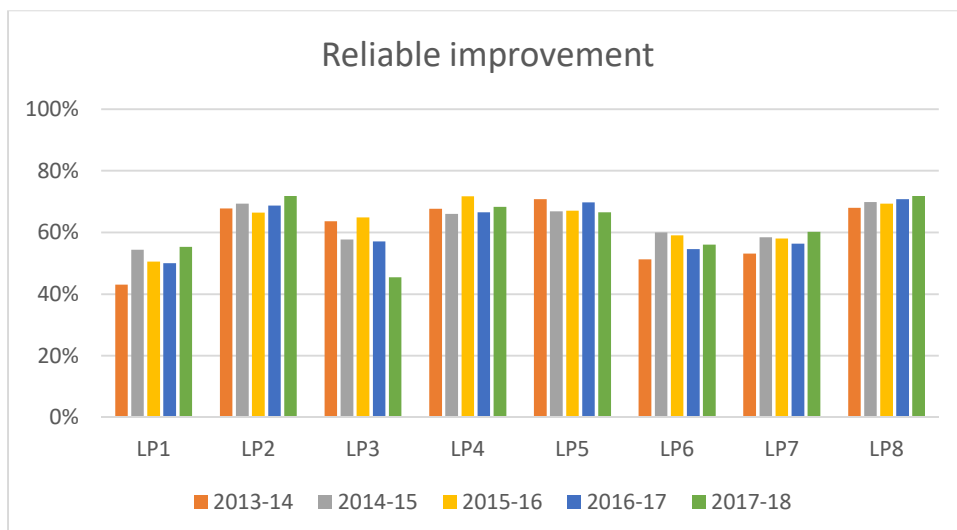

**Figure C4. Proportion of patients reporting deterioration across profiles by financial year.**

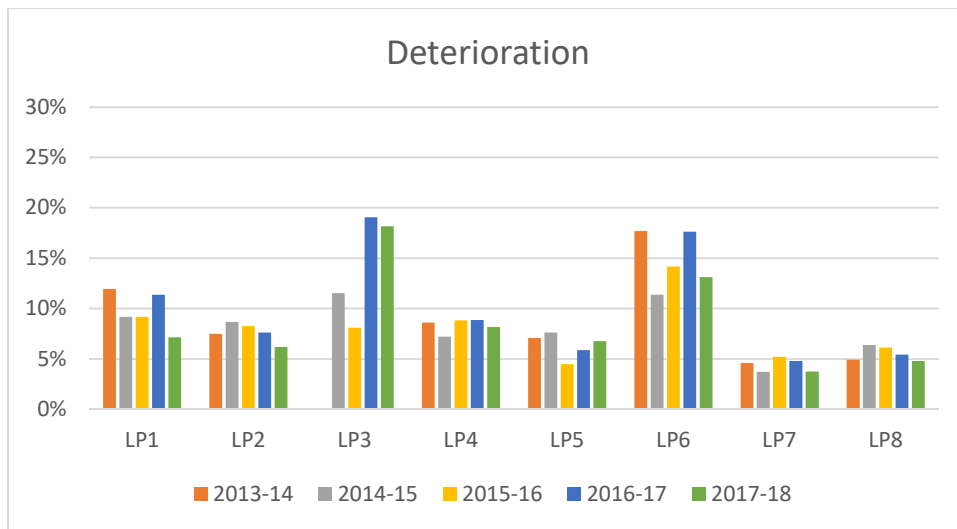

**Figure C5. Proportion of patients dropping out across profiles by financial year.**

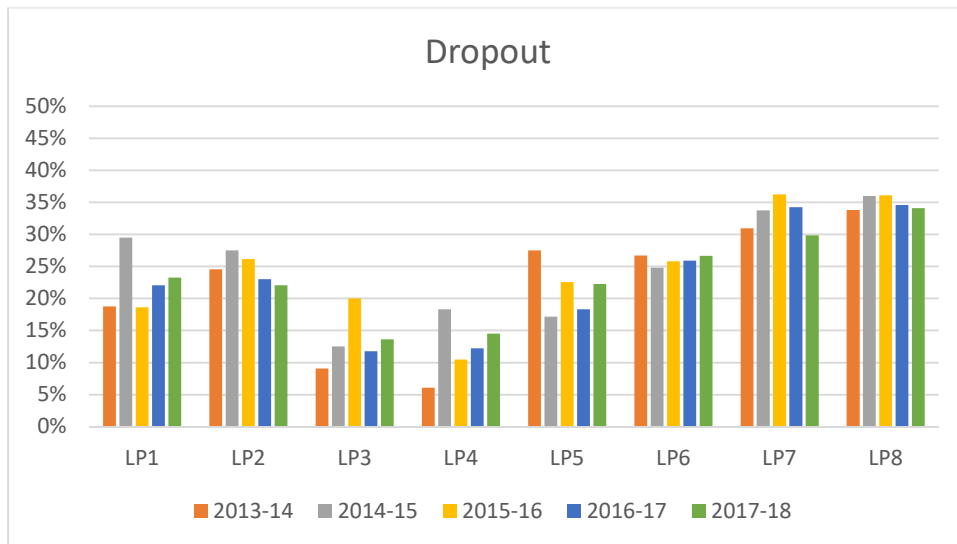

**Appendix D. Comparison of outcomes by profiles for patients receiving LI vs HI psychological interventions.**

**Table D1: Number of patients receiving intensity of IAPT treatment by profile.**

| Profile | LI only |        | HI only |        | Received both |        | Total |
|---------|---------|--------|---------|--------|---------------|--------|-------|
|         | n       | %      | N       | %      | n             | %      |       |
| LP1     | 304     | 20.25% | 510     | 33.98% | 687           | 45.77% | 1501  |
| LP2     | 1283    | 21.34% | 1968    | 32.73% | 2761          | 45.92% | 6012  |
| LP3     | 33      | 27.97% | 50      | 42.37% | 35            | 29.66% | 118   |
| LP4     | 228     | 20.67% | 468     | 42.43% | 407           | 36.90% | 1103  |
| LP5     | 408     | 21.28% | 766     | 39.96% | 743           | 38.76% | 1917  |
| LP6     | 444     | 24.94% | 613     | 34.44% | 723           | 40.62% | 1780  |
| LP7     | 214     | 15.52% | 642     | 46.56% | 523           | 37.93% | 1379  |
| LP8     | 926     | 19.69% | 1716    | 36.48% | 2062          | 43.84% | 4704  |
| Total   | 3840    | 20.74% | 6733    | 36.37% | 7941          | 42.89% | 18514 |

**Table D2. Proportion of patients reporting recovery following LI or HI interventions**

| Profile | LI        |       |        | HI        |       |        | Comparison             |                 |                 | p-value |
|---------|-----------|-------|--------|-----------|-------|--------|------------------------|-----------------|-----------------|---------|
|         | Recovered | Total | %      | Recovered | Total | %      | Odds Ratio<br>HI vs LI | Lower<br>95% CI | Upper<br>95% CI |         |
| LP1     | 328       | 478   | 68.62% | 338       | 476   | 71.01% | 1.120                  | 0.849           | 1.477           | 0.422   |
| LP2     | 993       | 1903  | 52.18% | 1025      | 1900  | 53.95% | 1.074                  | 0.945           | 1.219           | 0.275   |
| LP3     | 8         | 11    | 72.73% | 8         | 11    | 72.73% | 1.000                  | 0.153           | 6.531           | 1.000   |
| LP4     | 241       | 366   | 65.85% | 235       | 366   | 64.21% | 0.930                  | 0.687           | 1.261           | 0.642   |
| LP5     | 211       | 701   | 30.10% | 212       | 701   | 30.24% | 1.007                  | 0.801           | 1.265           | 0.954   |
| LP6     | 290       | 580   | 50.00% | 293       | 580   | 50.52% | 1.021                  | 0.811           | 1.285           | 0.86    |
| LP7     | 64        | 571   | 11.21% | 91        | 571   | 15.94% | 1.502                  | 1.066           | 2.117           | 0.02    |
| LP8     | 395       | 1608  | 24.56% | 493       | 1608  | 30.66% | 1.358                  | 1.162           | 1.586           | <0.001  |

**Table D3. Proportion of patients reporting reliable recovery following LI or HI interventions**

| Profile | LI                |       |        | HI                |       |        | Comparison             |                 |                 | p-value |
|---------|-------------------|-------|--------|-------------------|-------|--------|------------------------|-----------------|-----------------|---------|
|         | Reliable recovery | Total | %      | Reliable recovery | Total | %      | Odds Ratio<br>HI vs LI | Lower<br>95% CI | Upper<br>95% CI |         |
| LP1     | 206               | 478   | 43.10% | 225               | 471   | 47.77% | 1.208                  | 0.935           | 1.560           | 0.148   |
| LP2     | 941               | 1903  | 49.45% | 942               | 1882  | 50.05% | 1.024                  | 0.902           | 1.164           | 0.71    |
| LP3     | 8                 | 11    | 72.73% | 6                 | 11    | 54.55% | 0.450                  | 0.076           | 2.669           | 0.379   |
| LP4     | 231               | 366   | 63.11% | 210               | 366   | 57.38% | 0.787                  | 0.585           | 1.058           | 0.113   |
| LP5     | 211               | 701   | 30.10% | 208               | 697   | 29.84% | 0.988                  | 0.786           | 1.242           | 0.916   |
| LP6     | 261               | 580   | 45.00% | 250               | 580   | 43.10% | 0.926                  | 0.734           | 1.168           | 0.515   |
| LP7     | 64                | 571   | 11.21% | 91                | 571   | 15.94% | 1.502                  | 1.066           | 2.117           | 0.02    |
| LP8     | 395               | 1608  | 24.56% | 484               | 1599  | 30.27% | 1.333                  | 1.141           | 1.558           | <0.001  |



**Table D4. Proportion of patients reporting reliable improvement following LI or HI interventions**

| Profile | LI                   |       |        | HI                   |       |        | Comparison          |              |              |         |
|---------|----------------------|-------|--------|----------------------|-------|--------|---------------------|--------------|--------------|---------|
|         | Reliable improvement | Total | %      | Reliable improvement | Total | %      | Odds Ratio HI vs LI | Lower 95% CI | Upper 95% CI | p-value |
| LP1     | 208                  | 478   | 43.51% | 238                  | 458   | 51.97% | 1.404               | 1.086        | 1.817        | 0.01    |
| LP2     | 1242                 | 1886  | 65.85% | 1274                 | 1864  | 68.35% | 1.120               | 0.977        | 1.283        | 0.104   |
| LP3     | 8                    | 11    | 72.73% | 6                    | 11    | 54.55% | 0.450               | 0.076        | 2.669        | 0.379   |
| LP4     | 281                  | 366   | 76.78% | 244                  | 366   | 66.67% | 0.605               | 0.437        | 0.838        | 0.002   |
| LP5     | 474                  | 701   | 67.62% | 463                  | 698   | 66.33% | 0.944               | 0.755        | 1.179        | 0.609   |
| LP6     | 326                  | 580   | 56.21% | 311                  | 578   | 53.81% | 0.908               | 0.720        | 1.144        | 0.412   |
| LP7     | 268                  | 571   | 46.94% | 327                  | 570   | 57.37% | 1.521               | 1.204        | 1.922        | <0.001  |
| LP8     | 1112                 | 1608  | 69.15% | 1069                 | 1596  | 66.98% | 0.905               | 0.780        | 1.050        | 0.187   |

**Table D5. Proportion of patients reporting clinical deterioration following LI or HI interventions**

| Profile | LI            |       |        | HI            |       |        | Comparison          |              |              |         |
|---------|---------------|-------|--------|---------------|-------|--------|---------------------|--------------|--------------|---------|
|         | Deterioration | Total | %      | Deterioration | Total | %      | Odds Ratio HI vs LI | Lower 95% CI | Upper 95% CI | p-value |
| LP1     | 43            | 478   | 9.00%  | 41            | 456   | 8.99%  | 0.999               | 0.638        | 1.565        | 0.998   |
| LP2     | 139           | 1885  | 7.37%  | 137           | 1839  | 7.45%  | 1.011               | 0.791        | 1.292        | 0.93    |
| LP3     | 0             | 11    | 0.00%  | 2             | 11    | 18.18% | n/a                 | n/a          | n/a          | n/a     |
| LP4     | 31            | 366   | 8.47%  | 35            | 364   | 9.62%  | 1.150               | 0.693        | 1.908        | 0.59    |
| LP5     | 55            | 701   | 7.85%  | 48            | 691   | 6.95%  | 0.877               | 0.586        | 1.311        | 0.522   |
| LP6     | 103           | 580   | 17.76% | 79            | 578   | 13.67% | 0.733               | 0.533        | 1.009        | 0.056   |
| LP7     | 26            | 571   | 4.55%  | 26            | 566   | 4.59%  | 1.009               | 0.579        | 1.761        | 0.974   |
| LP8     | 101           | 1608  | 6.28%  | 86            | 1575  | 5.46%  | 0.862               | 0.641        | 1.159        | 0.325   |

## **Appendix E. Comparison of outcomes by profiles for patients receiving CBT vs Counselling.**

Note: LP3 has been excluded from analyses due to small sample size.

**Table E1. Proportion of patients reporting recovery following CBT or Counselling**

| Profile | CBT       |       |        | Counselling |       |        | Comparison                          |                 |                 |         |
|---------|-----------|-------|--------|-------------|-------|--------|-------------------------------------|-----------------|-----------------|---------|
|         | Recovered | Total | %      | Recovered   | Total | %      | Odds Ratio<br>Counselling<br>vs CBT | Lower<br>95% CI | Upper<br>95% CI | p-value |
| LP1     | 40        | 54    | 74.07% | 42          | 54    | 77.78% | 1.225                               | 0.506           | 2.966           | 0.653   |
| LP2     | 188       | 311   | 60.45% | 176         | 312   | 56.41% | 0.847                               | 0.615           | 1.165           | 0.306   |
| LP4     | 140       | 178   | 78.65% | 104         | 178   | 58.43% | 0.381                               | 0.239           | 0.608           | <0.001  |
| LP5     | 103       | 271   | 38.01% | 67          | 271   | 24.72% | 0.536                               | 0.370           | 0.775           | 0.001   |
| LP6     | 46        | 112   | 41.07% | 55          | 112   | 49.11% | 1.384                               | 0.816           | 2.348           | 0.227   |
| LP7     | 35        | 171   | 20.47% | 25          | 171   | 14.62% | 0.665                               | 0.379           | 1.169           | 0.157   |
| LP8     | 104       | 252   | 41.27% | 77          | 252   | 30.56% | 0.626                               | 0.434           | 0.904           | 0.012   |

**Table E2. Proportion of patients reporting reliable recovery following CBT or Counselling**

| Profile | CBT                  |       |        | Counselling          |       |        | Comparison                          |                 |                 |         |
|---------|----------------------|-------|--------|----------------------|-------|--------|-------------------------------------|-----------------|-----------------|---------|
|         | Reliable<br>recovery | Total | %      | Reliable<br>recovery | Total | %      | Odds Ratio<br>Counselling<br>vs CBT | Lower<br>95% CI | Upper<br>95% CI | p-value |
| LP1     | 27                   | 53    | 50.94% | 30                   | 54    | 55.56% | 1.204                               | 0.563           | 2.575           | 0.633   |
| LP2     | 168                  | 308   | 54.55% | 169                  | 312   | 54.17% | 0.985                               | 0.718           | 1.351           | 0.925   |
| LP4     | 124                  | 178   | 69.66% | 95                   | 178   | 53.37% | 0.498                               | 0.323           | 0.770           | 0.002   |
| LP5     | 98                   | 266   | 36.84% | 67                   | 271   | 24.72% | 0.563                               | 0.388           | 0.817           | 0.002   |
| LP6     | 44                   | 112   | 39.29% | 50                   | 112   | 44.64% | 1.246                               | 0.732           | 2.121           | 0.417   |
| LP7     | 35                   | 171   | 20.47% | 25                   | 171   | 14.62% | 0.665                               | 0.379           | 1.169           | 0.157   |
| LP8     | 102                  | 250   | 40.80% | 77                   | 252   | 30.56% | 0.638                               | 0.442           | 0.922           | 0.017   |

**Table E3. Proportion of patients reporting reliable improvement following CBT or Counselling**

| Profile | CBT                  |       |        | Counselling          |       |        | Comparison                    |              |              |         |
|---------|----------------------|-------|--------|----------------------|-------|--------|-------------------------------|--------------|--------------|---------|
|         | Reliable improvement | Total | %      | Reliable improvement | Total | %      | Odds Ratio Counselling vs CBT | Lower 95% CI | Upper 95% CI | p-value |
| LP1     | 29                   | 53    | 54.72% | 31                   | 54    | 57.41% | 1.115                         | 0.520        | 2.394        | 0.779   |
| LP2     | 217                  | 302   | 71.85% | 222                  | 312   | 71.15% | 0.966                         | 0.681        | 1.372        | 0.848   |
| LP4     | 133                  | 178   | 74.72% | 114                  | 178   | 64.04% | 0.603                         | 0.382        | 0.951        | 0.03    |
| LP5     | 207                  | 271   | 76.38% | 167                  | 271   | 61.62% | 0.496                         | 0.342        | 0.720        | <0.001  |
| LP6     | 65                   | 112   | 58.04% | 64                   | 112   | 57.14% | 0.964                         | 0.567        | 1.638        | 0.892   |
| LP7     | 108                  | 170   | 63.53% | 112                  | 171   | 65.50% | 1.090                         | 0.699        | 1.698        | 0.704   |
| LP8     | 177                  | 249   | 71.08% | 168                  | 252   | 66.67% | 0.814                         | 0.557        | 1.188        | 0.286   |

**Table E4. Proportion of patients reporting clinical deterioration following CBT or Counselling**

| Profile | CBT           |       |        | Counselling   |       |        | Comparison                    |              |              |         |
|---------|---------------|-------|--------|---------------|-------|--------|-------------------------------|--------------|--------------|---------|
|         | Deterioration | Total | %      | Deterioration | Total | %      | Odds Ratio Counselling vs CBT | Lower 95% CI | Upper 95% CI | p-value |
| LP1     | 4             | 53    | 7.55%  | 7             | 54    | 12.96% | 1.824                         | 0.501        | 6.641        | 0.362   |
| LP2     | 21            | 302   | 6.95%  | 24            | 312   | 7.69%  | 1.115                         | 0.607        | 2.049        | 0.726   |
| LP4     | 7             | 176   | 3.98%  | 20            | 178   | 11.24% | 3.056                         | 1.258        | 7.424        | 0.014   |
| LP5     | 11            | 258   | 4.26%  | 22            | 271   | 8.12%  | 1.984                         | 0.942        | 4.178        | 0.071   |
| LP6     | 20            | 112   | 17.86% | 18            | 112   | 16.07% | 0.881                         | 0.438        | 1.771        | 0.722   |
| LP7     | 2             | 169   | 1.18%  | 6             | 171   | 3.51%  | 3.036                         | 0.604        | 15.262       | 0.178   |
| LP8     | 6             | 246   | 2.44%  | 13            | 252   | 5.16%  | 2.176                         | 0.813        | 5.819        | 0.121   |
